# Supplementary material for: A systematic review and meta-analysis of complementary and alternative medicine in asthma
Source: PubMed Central journal article supplement — Eur Respir Rev. 2017 Feb 1;26(143):160092. doi: 10.1183/16000617.0092-2016 (PMC9488626; doi:10.1183/16000617.0092-2016), 2017-02-01
Supplement: ERR-0092-2016_supplementary_material.pdf [file ERR-0092-2016_supplementary_material.pdf]

## Search strategies for selected databases

### MEDLINE

1. Medline; "algae".ti,ab; 17860 results.
2. Medline; "aloe vera".ti,ab; 962 results.
3. Medline; "andrographis paniculata".ti,ab; 591 results.
4. Medline; "anthocyanidins".ti,ab; 438 results.
5. Medline; "anthroposophy".ti,ab; 27 results.
6. Medline; "antineoplaston".ti,ab; 74 results.
7. Medline; "antler velvet".ti,ab; 24 results.
8. Medline; "arabic medicine".ti,ab; 76 results.
9. Medline; "arnica montana".ti,ab; 157 results.
10. Medline; "aromatherapy".ti,ab; 747 results.
11. Medline; "aromatic oils".ti,ab; 26 results.
12. Medline; "ayurvedic medicine".ti,ab; 450 results.
13. Medline; "blackcurrant seed oil".ti,ab; 15 results.
14. Medline; "capsaicin".ti,ab; 11841 results.
15. Medline; "cat's claw".ti,ab; 89 results.
16. Medline; "cetylated fatty acids".ti,ab; 6 results.
17. Medline; "chinese herbal".ti,ab; 4766 results.
18. Medline; "CFAs".ti,ab; 387 results.
19. Medline; "chinese herbal drugs".ti,ab; 171 results.
20. Medline; "chondroitin".ti,ab; 12548 results.
21. Medline; "collagen".ti,ab; 155016 results.
22. Medline; "cryptophyta".ti,ab; 92 results.
23. Medline; "curcumin".ti,ab; 8712 results.
24. Medline; "devil's claw".ti,ab; 90 results.
25. Medline; "dietary supplements".ti,ab; 5434 results.
26. Medline; "duhuo jisheng wan".ti,ab; 2 results.
27. Medline; "DJW".ti,ab; 8 results.
28. Medline; "evening primrose oil".ti,ab; 421 results.
29. Medline; "feverfew".ti,ab; 251 results.
30. Medline; "fish oil".ti,ab; 7636 results.
31. Medline; "flaxseed oil".ti,ab; 367 results.
32. Medline; "fungi".ti,ab; 57636 results.
33. Medline; "ginger".ti,ab; 2006 results.
34. Medline; "glucosamine".ti,ab; 12399 results.
35. Medline; "herb\*".ti,ab; 61449 results. 3
6. Medline; "medicinal herbs".ti,ab; 1658 results.
37. Medline; "homeopath\*".ti,ab; 3955 results.
38. Medline; "kampo".ti,ab; 983 results.
39. Medline; "macrobio\*".ti,ab; 247 results.
40. Medline; "magnesium".ti,ab; 48131 results.
41. Medline; "peppermint".ti,ab; 901 results.
42. Medline; "mesotherapy".ti,ab; 187 results.
43. Medline; "moxibust\*".ti,ab; 1812 results.

44. Medline; "natural remedies".ti,ab; 246 results.
45. Medline; "naturopath\*".ti,ab; 860 results.
46. Medline; "nutritional therapy".ti,ab; 1487 results.
47. Medline; "oriental medicine".ti,ab; 783 results.
48. Medline; "pepper".ti,ab; 4451 results.
49. Medline; "pine bark extracts".ti,ab; 5 results.
50. Medline; "plants extract".ti,ab; 36 results.
51. Medline; "rosehip".ti,ab; 59 results.
52. Medline; "willow".ti,ab; 1144 results.
53. Medline; "selenium".ti,ab; 22722 results.
54. Medline; "stinging nettle".ti,ab; 143 results.
55. Medline; "TCM".ti,ab; 6935 results.
56. Medline; "tea tree".ti,ab; 508 results.
57. Medline; "thiamine".ti,ab; 8614 results.
58. Medline; "turmeric".ti,ab; 1943 results.
59. Medline; "unani".ti,ab; 339 results.
60. Medline; "vitamin A".ti,ab; 21144 results.
61. Medline; "vitamin B complex".ti,ab; 606 results.
62. Medline; "vitamin C".ti,ab; 17496 results.
63. Medline; "vitamin E".ti,ab; 24507 results.
64. Medline; "vitamin K".ti,ab; 11118 results.
65. Medline; "weed".ti,ab; 3783 results.
66. Medline; "asthma".ti,ab; 123162 results.
67. Medline; "respiratory sounds".ti,ab; 248 results.
68. Medline; "bronchospasm".ti,ab; 4325 results.
69. Medline; "bronchial hyperreacti\*".ti,ab; 2196 results.
70. Medline; "bronchial hypersensitiv\*".ti,ab; 123 results.
71. Medline; "bronchoconstrict\*".ti,ab; 8510 results.
72. Medline; "respiratory tract allergy".ti,ab; 34 results.
73. Medline; "wheez\*".ti,ab; 11375 results.
74. Medline; "controlled clinical trial".ti,ab; 10755 results.
75. Medline; "randomized".ti,ab; 383746 results.
76. Medline; "randomised".ti,ab; 76457 results.
77. Medline; "randomized controlled trial".ti,ab; 46837 results.
78. Medline; "randomised controlled trial".ti,ab; 14377 results.
79. Medline; "CAM".ti,ab; 21067 results.
80. Medline; "complementary alternative medicine".ti,ab; 345 results.
81. Medline; 1 OR 2 OR 3 OR 4 OR 5 OR 6 OR 7 OR 8 OR 9 OR 10 OR 11 OR 12 OR 13 OR 14 OR 15 OR 16 OR 17 OR 18 OR 19 OR 20 OR 21 OR 22 OR 23 OR 24 OR 25 OR 26 OR 27 OR 28 OR 29 OR 29 OR 30 OR 31 OR 32 OR 33 OR 34 OR 36 OR 35 OR 36 OR 37 OR 40 OR 38 OR 39 OR 40 OR 41 OR 42 OR 43 OR 47 OR 44 OR 45 OR 46 OR 47 OR 48 OR 53 OR 49 OR 50 OR 51 OR 52 OR 53 OR 59 OR 54 OR 55 OR 56 OR 57 OR 64 OR 58 OR 59 OR 60 OR 61 OR 69 OR 62 OR 63 OR 64 OR 65 OR 74 OR 75 OR 79 OR 80; 614470 results.
82. Medline; 66 OR 67 OR 78 OR 68 OR 69 OR 70 OR 71 OR 72 OR 73; 136010

results.

83. Medline; 74 OR 75 OR 76 OR 77 OR 78 OR 90 OR 91 OR 92; 510699 results.

84. Medline; 81 AND 82 AND 83; 394 results.

85. Medline; 84 [Limit to: Publication Year 1990-2015 and (Language English) and Humans]; 286 results.

86. Medline; "vitamin D".ti,ab; 46546 results.

87. Medline; 81 OR 86; 656990 results.

88. Medline; 83 AND 84 AND 87; 460 results.

89. Medline; 88 [Limit to: Publication Year 1990-2016 and (Language English) and Humans]; 342 results.

#### EMBASE

1. EMBASE; "algae".ti,ab; 19616 results.

2. EMBASE; "aloe vera".ti,ab; 1606 results.

3. EMBASE; "andrographis paniculata".ti,ab; 992 results.

4. EMBASE; "anthocyanidins".ti,ab; 550 results.

5. EMBASE; "anthroposophy".ti,ab; 51 results.

6. EMBASE; "antineoplaston".ti,ab; 115 results.

7. EMBASE; "antler velvet".ti,ab; 30 results.

8. EMBASE; "arabic medicine".ti,ab; 82 results.

9. EMBASE; "aromatherapy".ti,ab; 1188 results.

10. EMBASE; "aromatic oils".ti,ab; 38 results.

11. EMBASE; "ayurvedic medicine".ti,ab; 740 results.

12. EMBASE; "blackcurrant seed oil".ti,ab; 19 results.

13. EMBASE; "capsaicin".ti,ab; 14684 results.

14. EMBASE; "cat's claw".ti,ab; 129 results.

15. EMBASE; "cetylated fatty acids".ti,ab; 7 results.

16. EMBASE; "chinese herbal".ti,ab; 6256 results.

17. EMBASE; "CFAs".ti,ab; 439 results.

18. EMBASE; "chinese herbal drugs".ti,ab; 211 results.

19. EMBASE; "chondroitin".ti,ab; 14324 results.

20. EMBASE; "collagen".ti,ab; 194949 results.

21. EMBASE; "cryptophyta".ti,ab; 85 results.

22. EMBASE; "curcumin".ti,ab; 11852 results.

23. EMBASE; "devil's claw".ti,ab; 154 results.

24. EMBASE; "dietary supplements".ti,ab; 7340 results.

25. EMBASE; "duhuo jisheng wan".ti,ab; 3 results.

26. EMBASE; "DJW".ti,ab; 15 results.

27. EMBASE; "evening primrose oil".ti,ab; 537 results.

28. EMBASE; "EPO".ti,ab; 13689 results.

29. EMBASE; "feverfew".ti,ab; 375 results.

30. EMBASE; "fish oil".ti,ab; 9643 results.

31. EMBASE; "flaxseed oil".ti,ab; 478 results.

32. EMBASE; "fungi".ti,ab; 68070 results.

33. EMBASE; "ginger".ti,ab; 2961 results.

34. EMBASE; "glucosamine".ti,ab; 13507 results.

35. EMBASE; "green-lipped mussel".ti,ab; 138 results.
36. EMBASE; "herb\*".ti,ab; 99722 results.
37. EMBASE; "medicinal herbs".ti,ab; 2369 results.
38. EMBASE; "homeopath\*".ti,ab; 5459 results.
39. EMBASE; "indian frankincense".ti,ab; 11 results.
40. EMBASE; "kampo".ti,ab; 1542 results.
41. EMBASE; "macrobio\*".ti,ab; 355 results.
42. EMBASE; "magnesium".ti,ab; 57151 results.
43. EMBASE; "peppermint".ti,ab; 1346 results.
44. EMBASE; "mesotherapy".ti,ab; 297 results.
45. EMBASE; "moxibust\*".ti,ab; 2450 results.
46. EMBASE; "MSM".ti,ab; 8986 results.
47. EMBASE; "natural remedies".ti,ab; 395 results.
48. EMBASE; "naturopath\*".ti,ab; 1160 results.
49. EMBASE; "nutritional therapy".ti,ab; 2308 results.
50. EMBASE; "oriental medicine".ti,ab; 1171 results.
51. EMBASE; "pepper".ti,ab; 5192 results.
52. EMBASE; "phyto\*".ti,ab; 101456 results.
53. EMBASE; "pine bark extracts".ti,ab; 5 results.
54. EMBASE; "plants extract".ti,ab; 127 results.
55. EMBASE; "rosehip".ti,ab; 80 results.
56. EMBASE; "willow".ti,ab; 1311 results.
57. EMBASE; "selenium".ti,ab; 27427 results.
58. EMBASE; "shamanism".ti,ab; 132 results.
59. EMBASE; "stinging nettle".ti,ab; 218 results.
60. EMBASE; "TCM".ti,ab; 9583 results.
61. EMBASE; "tea tree".ti,ab; 711 results.
62. EMBASE; "thiamine".ti,ab; 8950 results.
63. EMBASE; "traditional chinese medicine".ti,ab; 16556 results.
64. EMBASE; "turmeric".ti,ab; 2854 results.
65. EMBASE; "unani".ti,ab; 694 results.
66. EMBASE; "vitamin A".ti,ab; 23202 results.
67. EMBASE; "vitamin B complex".ti,ab; 563 results.
68. EMBASE; "vitamin B6".ti,ab; 5740 results.
69. EMBASE; "vitamin C".ti,ab; 21227 results.
70. EMBASE; "vitamin E".ti,ab; 28869 results.
71. EMBASE; "vitamin K".ti,ab; 15449 results.
72. EMBASE; "weed".ti,ab; 4541 results.
73. EMBASE; "willow bark".ti,ab; 189 results.
74. EMBASE; "rose".ti,ab; 65857 results.
75. EMBASE; "asthma".ti,ab; 171850 results.
76. EMBASE; "respiratory sounds".ti,ab; 355 results.
77. EMBASE; "bronchial spasm".ti,ab; 192 results.
78. EMBASE; "bronchospasm".ti,ab; 5947 results.
79. EMBASE; "bronchial hyperreacti\*".ti,ab; 2632 results.

80. EMBASE; "bronchial hypersensitiv\*".ti,ab; 160 results.
81. EMBASE; "bronchoconstrict\*".ti,ab; 10398 results.
82. EMBASE; "respiratory tract allergy".ti,ab; 45 results.
83. EMBASE; "wheez\*".ti,ab; 17419 results.
84. EMBASE; "controlled clinical trial".ti,ab; 13682 results.
85. EMBASE; "randomized".ti,ab; 542378 results.
86. EMBASE; "randomised".ti,ab; 109152 results.
87. EMBASE; "randomized controlled trial".ti,ab; 61503 results.
88. EMBASE; "randomised controlled trial".ti,ab; 19706 results.
89. EMBASE; "RCT".ti,ab; 21893 results.
90. EMBASE; "double-blind\*".ti,ab; 171349 results.
91. EMBASE; "single-blind\*".ti,ab; 18417 results.
92. EMBASE; "CAM".ti,ab; 25255 results.
93. EMBASE; "complementary alternative medicine".ti,ab; 487 results.
94. EMBASE; "SAME".ti,ab; 1331240 results.
95. EMBASE; 1 OR 2 OR 3 OR 4 OR 5 OR 6 OR 7 OR 8 OR 9 OR 10 OR 11 OR 12 OR 13 OR 14 OR 15 OR 16 OR 17 OR 18 OR 19 OR 20 OR 21 OR 22 OR 23 OR 24 OR 25 OR 26 OR 27 OR 28 OR 29 OR 30 OR 31 OR 32 OR 33 OR 34 OR 35 OR 36 OR 37 OR 38 OR 39 OR 40 OR 41 OR 42 OR 43 OR 44 OR 45 OR 46 OR 47 OR 48 OR 49 OR 50 OR 51 OR 52 OR 53 OR 54 OR 55 OR 56 OR 57 OR 58 OR 59 OR 60 OR 61 OR 62 OR 63 OR 64 OR 65 OR 66 OR 67 OR 68 OR 69 OR 70 OR 71 OR 72 OR 73 OR 74 OR 92 OR 93 OR 94; 2126567 results.
96. EMBASE; 75 OR 76 OR 77 OR 78 OR 79 OR 80 OR 81 OR 82 OR 83; 189121 results.
97. EMBASE; 84 OR 85 OR 86 OR 87 OR 88 OR 89 OR 90 OR 91; 714560 results.
98. EMBASE; 95 AND 96 AND 97; 1414 results.
99. EMBASE; 98 [Limit to: Human and (Languages English) and Publication Year 1990-2015]; 1044 results.
100. EMBASE; "vitamin D".ti,ab; 67130 results.
101. EMBASE; 95 OR 100; 2184737 results.
102. EMBASE; 96 AND 97 AND 101; 1533 results.
103. EMBASE; 102 [Limit to: Human and (Languages English) and Publication Year 1990-2016]; 1211 results.

#### AMED

1. AMED; "algae".ti,ab; 59 results.
2. AMED; "aloe vera".ti,ab; 102 results.
3. AMED; "andrographis paniculata".ti,ab; 64 results.
4. AMED; "anthocyanidins".ti,ab; 8 results.
5. AMED; "anthroposophy".ti,ab; 24 results.
6. AMED; "antineoplaston".ti,ab; 0 results.
7. AMED; "antler velvet".ti,ab; 0 results.
8. AMED; "arabic medicine".ti,ab; 7 results.
9. AMED; "arnica montana".ti,ab; 52 results.
10. AMED; "aromatherapy".ti,ab; 386 results.
11. AMED; "aromatic oils".ti,ab; 3 results.

12. AMED; "ayurvedic medicine".ti,ab; 85 results.
13. AMED; "blackcurrant seed oil".ti,ab; 2 results.
14. AMED; "capsaicin".ti,ab; 108 results.
15. AMED; "cat's claw".ti,ab; 19 results.
16. AMED; "cetylated fatty acids".ti,ab; 0 results.
17. AMED; "chinese herbal".ti,ab; 590 results.
18. AMED; "CFAs".ti,ab; 8 results.
19. AMED; "chinese herbal drugs".ti,ab; 16 results.
20. AMED; "chondroitin".ti,ab; 32 results.
21. AMED; "collagen".ti,ab; 609 results.
22. AMED; "cryptophyta".ti,ab; 0 results.
23. AMED; "curcumin".ti,ab; 113 results.
24. AMED; "devil's claw".ti,ab; 27 results.
25. AMED; "dietary supplements".ti,ab; 258 results.
26. AMED; "duhuo jisheng wan".ti,ab; 0 results.
27. AMED; "DJW".ti,ab; 1 results.
28. AMED; "evening primrose oil".ti,ab; 30 results.
29. AMED; "EPO".ti,ab; 17 results.
30. AMED; "feverfew".ti,ab; 46 results.
31. AMED; "fish oil".ti,ab; 93 results.
32. AMED; "flaxseed oil".ti,ab; 7 results.
33. AMED; "fungi".ti,ab; 431 results.
34. AMED; "ginger".ti,ab; 159 results.
35. AMED; "glucosamine".ti,ab; 65 results.
36. AMED; "green-lipped mussel".ti,ab; 9 results.
37. AMED; "herb\*".ti,ab; 5089 results.
38. AMED; "medicinal herbs".ti,ab; 182 results.
39. AMED; "homeopath\*".ti,ab; 3481 results.
40. AMED; "indian frankincense".ti,ab; 1 results.
41. AMED; "kampo".ti,ab; 128 results.
42. AMED; "macrobio\*".ti,ab; 10 results.
43. AMED; "magnesium".ti,ab; 218 results.
44. AMED; "peppermint".ti,ab; 47 results.
45. AMED; "mesotherapy".ti,ab; 10 results.
46. AMED; "moxibust\*".ti,ab; 529 results.
47. AMED; "MSM".ti,ab; 8 results.
48. AMED; "natural remedies".ti,ab; 63 results.
49. AMED; "naturopath\*".ti,ab; 463 results.
50. AMED; "nutritional therapy".ti,ab; 53 results.
51. AMED; "oriental medicine".ti,ab; 136 results.
52. AMED; "pepper".ti,ab; 56 results.
53. AMED; "phyto\*".ti,ab; 2226 results.
54. AMED; "pine bark extracts".ti,ab; 0 results.
55. AMED; "plants extract".ti,ab; 7 results.
56. AMED; "rosehip".ti,ab; 2 results.

57. AMED; "willow".ti,ab; 37 results.
58. AMED; "selenium".ti,ab; 177 results.
59. AMED; "shamanism".ti,ab; 32 results.
60. AMED; "stinging nettle".ti,ab; 19 results.
61. AMED; "TCM".ti,ab; 946 results.
62. AMED; "tea tree".ti,ab; 47 results.
63. AMED; "thiamine".ti,ab; 10 results.
64. AMED; "traditional chinese medicine".ti,ab; 1322 results.
65. AMED; "turmeric".ti,ab; 74 results.
66. AMED; "unani".ti,ab; 52 results.
67. AMED; "vitamin A".ti,ab; 934 results.
68. AMED; "vitamin B complex".ti,ab; 12 results.
69. AMED; "vitamin B6".ti,ab; 57 results.
70. AMED; "vitamin C".ti,ab; 371 results.
71. AMED; "vitamin E".ti,ab; 312 results.
72. AMED; "vitamin K".ti,ab; 36 results.
73. AMED; "weed".ti,ab; 44 results.
74. AMED; "willow bark".ti,ab; 19 results.
75. AMED; "rose".ti,ab; 260 results.
76. AMED; "asthma".ti,ab; 1483 results.
77. AMED; "respiratory sounds".ti,ab; 0 results.
78. AMED; "bronchial spasm".ti,ab; 1 results.
79. AMED; "bronchospasm".ti,ab; 33 results.
80. AMED; "bronchial hyperreacti\*".ti,ab; 7 results.
81. AMED; "bronchial hypersensitiv\*".ti,ab; 0 results.
82. AMED; "bronchoconstrict\*".ti,ab; 63 results.
83. AMED; "respiratory tract allergy".ti,ab; 0 results.
84. AMED; "wheez\*".ti,ab; 76 results.
85. AMED; "controlled clinical trial".ti,ab; 387 results.
86. AMED; "randomized".ti,ab; 8458 results.
87. AMED; "randomised".ti,ab; 2069 results.
88. AMED; "randomized controlled trial".ti,ab; 2421 results.
89. AMED; "randomised controlled trial".ti,ab; 670 results.
90. AMED; "RCT".ti,ab; 287 results.
91. AMED; "double-blind\*".ti,ab; 1739 results.
92. AMED; "single-blind\*".ti,ab; 661 results.
93. AMED; "CAM".ti,ab; 1182 results.
94. AMED; "complementary alternative medicine".ti,ab; 1192 results.
95. AMED; 85 OR 86 OR 87 OR 88 OR 89 OR 90 OR 91 OR 92; 11199 results.
96. AMED; 76 OR 77 OR 78 OR 79 OR 80 OR 81 OR 82 OR 83 OR 84; 1564 results.
97. AMED; 1 OR 2 OR 3 OR 4 OR 5 OR 6 OR 7 OR 8 OR 9 OR 10 OR 11 OR 12 OR 13 OR 14 OR 15 OR 16 OR 17 OR 18 OR 19 OR 20 OR 21 OR 22 OR 23 OR 24 OR 25 OR 26 OR 27 OR 28 OR 29 OR 30 OR 31 OR 32 OR 33 OR 34 OR 35 OR 36 OR 37 OR 38 OR 39 OR 40 OR 41 OR 42 OR 43 OR 44 OR 45 OR 46 OR 47 OR 48 OR 49 OR 50 OR 51 OR 52 OR 53 OR 54 OR 55 OR 56 OR 57 OR 58

OR 59 OR 60 OR 61 OR 62 OR 63 OR 64 OR 65 OR 66 OR 67 OR 68 OR 69 OR 70 OR 71 OR 72 OR 73 OR 74 OR 75 OR 93 OR 94; 18082 results.

98. AMED; 95 AND 96 AND 97; 19 results.

99. AMED; 98 [Limit to: (Languages English) and Publication Year 1990-2015]; 18 results.

100. AMED; "vitamin D".ti,ab; 348 results.

101. AMED; 97 OR 100; 18225 results.

102. AMED; 95 AND 96 AND 101; 19 results.

103. AMED; 102 [Limit to: (Languages English) and Publication Year 1990-2016]; 18 results.

### COCHRANE LIBRARY

'("vitamin D" OR "algae" OR "aloe vera" OR "andrographis paniculata" OR "anthocyanidins" OR "anthroposophy" OR "antineoplaston" OR "antler velvet" OR "arabic medicine" OR "arnica montana" OR "aromatherapy" OR "aromatic oils" OR "ayurvedic medicine" OR "blackcurrant seed oil" OR "borage seed oil" OR "capsaicin" OR "cat's claw" OR "cetylated fatty acids" OR "CFAs" OR "chinese herbal" OR "chinese herbal drugs" OR "chondroitin" OR "collagen" OR "cryptophyta" OR "cur cumin" OR "devil's claw" OR "dietary supplements" OR "duhuo jisheng wan" OR "DJW" OR "evening primrose oil" OR "EPO" OR "feverfew" OR "fish oil" OR "flaxseed oil" OR "fungi" OR "ginger" OR "glucosamine" OR "green-lipped mussel" OR "herb\*" OR "medicinal herbs" OR "homeopath\*" OR "indian frankincense" OR "kampo" OR "macrobio\*" OR "magnesium" OR "peppermint" OR "mesotherapy" OR "moxibust\*" OR "MSM" OR "natural remedies" OR "naturopathy" OR "nutritional therapy" OR "oriental medicine" OR "pepper" OR "phyto\*" OR "pine bark extracts" OR "plants extract" OR "rosehip" OR "willow" OR "SAME" OR "selenium" OR "shamanism" OR "stinging nettle" OR "TCM" OR "tea tree" OR "thiamine" OR "traditional chinese medicine" OR "turmeric" OR "CAM" OR "complementary alternative medicine" OR "unani" OR "vitamin A" OR "vitamin B complex" OR "vitamin B6" OR "vitamin C" OR "vitamin E" OR "vitamin K" OR "weed" OR "willow bark" OR "rose") AND ("wheez\*" OR "asthma" OR "respiratory sounds" OR "bronchial spasm" OR "bronchospasm" OR "bronchoconstrict\*" OR "bronchial hyperreacti\*" OR "bronchial hypersensitiv\*" OR "respiratory tract allergy") AND ("controlled clinical trial" OR "randomized" OR "randomised" OR "randomized controlled trial" OR "randomised controlled trial" OR "RCT" OR "double-blind\*" OR



"single-blind\*") in Title, Abstract, Keywords, Publication Year from 1990 to 2016 in  
Cochrane Reviews'

76 Results
